# Supplementary material for: Plastid super-barcodes as a tool for species discrimination in feather grasses (Poaceae: Stipa)
Source: PubMed Central journal article supplement (PMC5792575; doi:10.1038/s41598-018-20399-w), 2018-01-31
Supplement: 41598_2018_20399_MOESM1_ESM.pdf [file 41598_2018_20399_MOESM1_ESM.pdf]

Title: **Plastid super-barcodes as a tool for species discrimination in feather grasses (Poaceae: *Stipa*)**

Authors: Katarzyna Krawczyk, Marcin Nobis, Kamil Myszczyński, Ewelina Klichowska, Jakub Sawicki

**Supplementary Information**

**Supplementary Table S1.** Specimens used in the study, sequence length and GenBank accession numbers.

| Taxon                                    | Section          | Country    | Voucher                                                                                    | Sequence length [bp] | GB accession number |
|------------------------------------------|------------------|------------|--------------------------------------------------------------------------------------------|----------------------|---------------------|
| <i>Stipa</i> × <i>alaica</i> Pazij       | <i>Smirnovia</i> | Kyrgyzstan | 40 km W of Sary-Tash, 2942 m, 3 Jul 2015, <i>M. Nobis</i> , <i>A. Nowak</i> (KRA); S/7/10  | 137 850              | MG052614            |
| <i>S. arabica</i> Trin. & Rupr.          | <i>Barbatae</i>  | Kyrgyzstan | Toktogul, 5 July 2013, <i>M. Nobis</i> & <i>A. Nowak</i> (KRA); S/61/4                     | 137 757              | MG052596            |
| <i>S. borysthena</i> Klok.               | <i>Stipa</i>     | Poland     | Gryfino, Dolna Odra, <i>A. Popiela</i> (SZUB); S/74/3                                      | 137 825              | MG052597            |
| <i>S.</i> × <i>brevicallosa</i> M. Nobis | <i>Smirnovia</i> | Tajikistan | Zeravshan Mts, Mogien settl., 25 May 2015, <i>M. Nobis</i> , <i>A. Nowak</i> (KRA); S/15/4 | 137 850              | MG052615            |
| <i>S. capillata</i> L.                   | <i>Leiostipa</i> | Russia     | Tyva Resp., 9 Jul 2007, <i>P. Shavrova</i> (KRA); S/4/2                                    | 137 830              | MG052598            |
| <i>S. capillata</i> L.                   | <i>Leiostipa</i> | Georgia    | 10 km N of Akhalkalaki (on road to Bakyriani), 27 Jul 1982, <i>Rusanovich</i> (KRA); S/4/3 | 137 835              | MG052599            |
| <i>S. caucasica</i> Schmalh.             | <i>Smirnovia</i> | Kazakhstan | 150 km W of Almaty, 18 May 2014, <i>M. Nobis</i> , <i>P. Gudkova</i> (KRA); S/53/1         | 137 798              | MG052600            |
| <i>S. caucasica</i> Schmalh.             | <i>Smirnovia</i> | Kyrgyzstan | Dzhel-Aryk, 16 Jun 2013, <i>M. Nobis</i> , <i>A.</i>                                       | 137 800              | MG052601            |

|                                                                         |                    |            |                                                                                                                     |         |          |
|-------------------------------------------------------------------------|--------------------|------------|---------------------------------------------------------------------------------------------------------------------|---------|----------|
|                                                                         |                    |            | <i>Nowak</i> (KRA);<br>S/53/4                                                                                       |         |          |
| <i>S. glareosa</i> P.A.<br>Smirn.                                       | <i>Smirnovia</i>   | Russia     | Baical, 21 Jul 2013,<br><i>A.L. Ebel</i> (KRA);<br>S/49/9                                                           | 137 602 | MG052602 |
| <i>S. hohenackeriana</i><br>Trin. & Rupr.                               | <i>Barbatae</i>    | Tajikistan | Zeravshan Mts,<br>Mogien, 27 May<br>2015, <i>M. Nobis</i> , <i>A.</i><br><i>Nowak</i> (KRA);<br>S/13/2              | 137 753 | MG052603 |
| <i>S. jagnobica</i> Ovcz.<br>& Czuk.                                    | <i>Leiostipa</i>   | Tajikistan | 0.5 km E of<br>Serimadarun Lake,<br>2320 m, 30 May<br>2015, <i>M. Nobis</i> ;<br>(KRA); S/9/4                       | 137 827 | MG052604 |
| <i>S. lessingiana</i> Trin.<br>& Rupr.                                  | <i>Subbarbatae</i> | Kazakhstan | 40 km NW of<br>Almaty, 690 m a.s.l.,<br>22 May 2014, <i>M.</i><br><i>Nobis</i> , <i>P. Gudkova</i><br>(KRA); 460167 | 137 829 | MG052605 |
| <i>S. magnifica</i> A.<br>Junge                                         | <i>Smirnovia</i>   | Kyrgyzstan | Tian-Shan Mts,<br>Tashkumyr, 650 m,<br>11 May 2011, <i>M.</i><br><i>Nobis</i> , <i>A. Nowak</i><br>(KRA); S/21/1    | 137 848 | MG052606 |
| <i>S. narynica</i> M.<br>Nobis                                          | <i>Smirnovia</i>   | Kyrgyzstan | E of Tashkumyr, 11<br>May 2011, <i>M.</i><br><i>Nobis</i> , <i>A. Nowak</i><br>(KRA); S/74/1                        | 137 854 | MG052607 |
| <i>S. orientalis</i> Trin.                                              | <i>Barbatae</i>    | Tajikistan | Zeravshan Mts, near<br>Iskanderkul Lake,<br>2300 m, 15 June<br>2011, <i>M. Nobis</i><br>(KRA); S/24/2               | 137 823 | MG052608 |
| <i>S. ovczinnikovii</i><br>Roshev.                                      | <i>Smirnovia</i>   | Tajikistan | Zeravshan Mts,<br>Vashan River valley,<br>1 Jun 2015, <i>M.</i><br><i>Nobis</i> (KRA);<br>S/17/7                    | 137 874 | MG052609 |
| <i>S. pennata</i> subsp.<br><i>ceynowae</i><br>Klichowska & M.<br>Nobis | <i>Stipa</i>       | Poland     | Folusz settl., May<br>2015, <i>E. Klichowska</i><br>(KRA); S/72/1                                                   | 137 825 | MG052611 |
| <i>S. pennata</i> L.<br>subsp. <i>pennata</i>                           | <i>Stipa</i>       | Poland     | Skarpy Ślesieńskie<br>near Slesin, May<br>2015, <i>E. Klichowska</i><br>(KRA); S/42/16                              | 137 818 | MG052610 |

|                                                                        |                  |            |                                                                                   |         |          |
|------------------------------------------------------------------------|------------------|------------|-----------------------------------------------------------------------------------|---------|----------|
| <i>S. richteriana</i> Kar. & Kir. subsp. <i>richteriana</i>            | <i>Leiostipa</i> | Kazakhstan | Balkhash, 22 May 2014, <i>M. Nobis</i> (KRA); S/70/1                              | 137 831 | MG052612 |
| <i>S. tianschanica</i> Roshev. subsp. <i>gobica</i> (Roshev.) D.F. Cui | <i>Smirnovia</i> | Mongolia   | Iche Bogdo, 27 Jul 1974, <i>A. Pacyna</i> (KRA); S/78/2                           | 137 847 | MG052613 |
| <i>S. zaleskii</i> Wlenskii                                            | <i>Stipa</i>     | Kyrgyzstan | 12 km NW of Sassumyr, 7 Jul 2015, <i>M. Nobis</i> , <i>A. Nowak</i> (KRA); S/83/1 | 137 836 | MG052616 |

**Supplementary Table S2.** Species delimited from set of analyzed individuals by PtP simple heuristic search.

| Species delimited by PtP analysis        | Posterior delimitation probability |
|------------------------------------------|------------------------------------|
| <i>Stipa</i> × <i>alaica</i>             | 0.880                              |
| <i>S. arabica</i>                        | 0.998                              |
| <i>S. borysthenica</i>                   | 0.247                              |
| <i>S.</i> × <i>brevicallosa</i>          | 0.375                              |
| <i>S. capillata</i>                      | 0.296                              |
| <i>S. caucasica</i>                      | 0.194                              |
| <i>S. caucasica</i> (Kazakhstan)         | 0.194                              |
| <i>S. caucasica</i> (Kyrgyzstan)         | 0.194                              |
| <i>S. glareosa</i>                       | 0.640                              |
| <i>S. hohenackeriana</i>                 | 0.996                              |
| <i>S. jagnobica</i>                      | 0.336                              |
| <i>S. lessingiana</i>                    | 0.336                              |
| <i>S. magnifica</i>                      | 0.795                              |
| <i>S. narynica</i>                       | 0.629                              |
| <i>S. orientalis</i>                     | 0.329                              |
| <i>S. ovczinnikovii</i>                  | 0.711                              |
| <i>S. pennata</i> subsp. <i>ceynowae</i> | 0.247                              |

|                                                 |       |
|-------------------------------------------------|-------|
| <i>S. pennata</i> subsp. <i>pennata</i>         | 0.730 |
| <i>S. richteriana</i> subsp. <i>richteriana</i> | 0.656 |
| <i>S. tianschanica</i> subsp. <i>gobica</i>     | 0.329 |
| <i>S. zalesskii</i>                             | 0.483 |
